# Supplementary material for: Low-moderate urine arsenic and biomarkers of thrombosis and inflammation in the Strong Heart Study
Source: PubMed Central journal article supplement (PMC5542675; doi:10.1371/journal.pone.0182435), 2017-08-03

**S1 Fig. Inclusion Criteria for Analyses in the Strong Heart Study Main Cohort (Visit 1, 2, and 3)**

SHS, Strong Heart Study; CVD, Cardiovascular disease; BMI, Body mass index; LDL, Low-density lipoprotein; eGFR, estimated glomerular filtration rate

\* Analyses include 12 SHS communities with available data and permission to conduct the study.

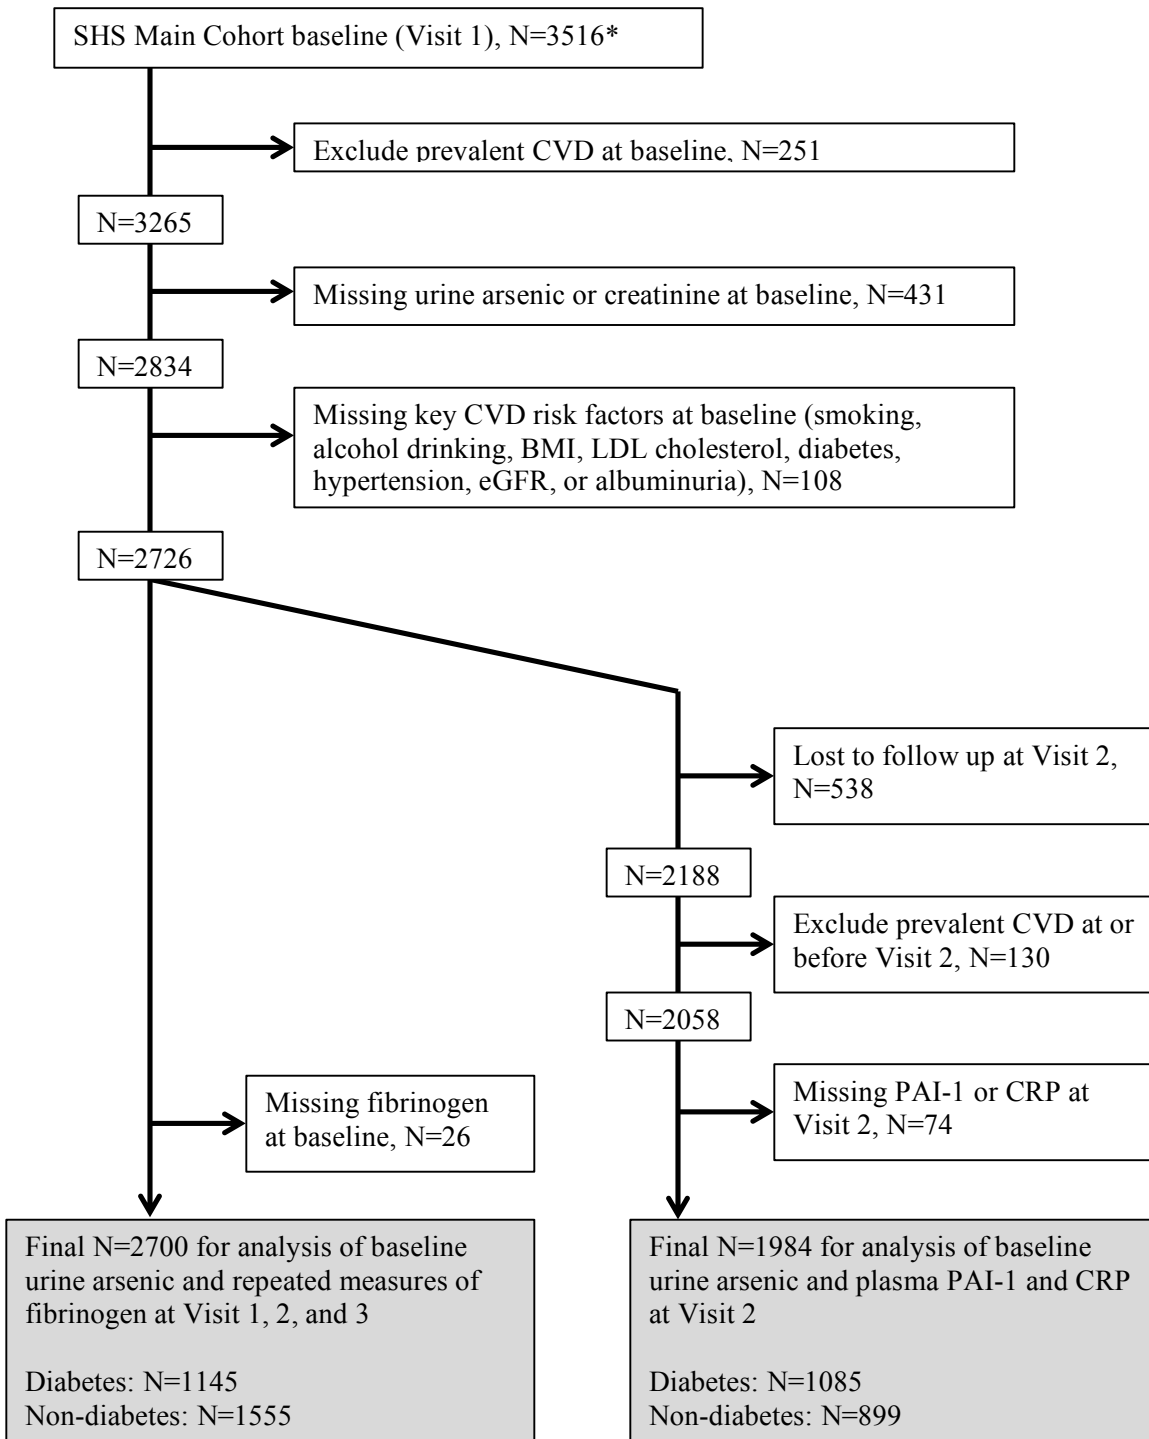

Supplement: pone.0182435.s001.pdf [file pone.0182435.s001.pdf]
